# Supplementary material for: Behavior Change Approaches in Digital Technology–Based Physical Rehabilitation Interventions Following Stroke: Scoping Review
Source: PubMed Central journal article supplement (PMC11079774; doi:10.2196/48725), 2024-04-24
Supplement: jmir_v26i1e48725_app2.pdf [file jmir_v26i1e48725_app2.pdf]

## Multimedia Appendix 2. Inclusion and exclusion criteria

Full text exclusions will report exclusion reason based on highest category (1 highest, 7 lowest).

| Category                                        | Inclusion                                                                                                                                                                                                                                                                                                                                                                                                                                                                                | Exclusion                                                                                                                                                                                                                                                                                                                                                                                                                     |
|-------------------------------------------------|------------------------------------------------------------------------------------------------------------------------------------------------------------------------------------------------------------------------------------------------------------------------------------------------------------------------------------------------------------------------------------------------------------------------------------------------------------------------------------------|-------------------------------------------------------------------------------------------------------------------------------------------------------------------------------------------------------------------------------------------------------------------------------------------------------------------------------------------------------------------------------------------------------------------------------|
| <b>1. Date</b>                                  | 2001-present                                                                                                                                                                                                                                                                                                                                                                                                                                                                             | Pre 2001                                                                                                                                                                                                                                                                                                                                                                                                                      |
| <b>2. Language</b>                              | English                                                                                                                                                                                                                                                                                                                                                                                                                                                                                  | Non-English                                                                                                                                                                                                                                                                                                                                                                                                                   |
| <b>3. Study type</b>                            | Completed primary research study (any study design) including digital health technology (DHT) development studies during which the intervention has been trialled                                                                                                                                                                                                                                                                                                                        | <p>Protocols and trial registry entries if a completed study is not found (excluded at full text searching)</p> <p>Abstract only without a full publication ((excluded at full text searching)</p> <p>Review or commentary</p> <p>DHT development papers prior to stage of participant trial</p>                                                                                                                              |
| <b>4. Participants involved in Intervention</b> | <p>Adults</p> <p>Diagnosis of stroke with a physical impairment in function as defined by the International Classification of Functioning, Disability and Health of</p> <ul style="list-style-type: none"> <li>a) Sensory functions and pain</li> <li>b) Neuromusculoskeletal and movement related functions (including swallow)</li> <li>c) Voice and speech</li> </ul> <p>Mixed conditions and adult/child participant groups where adult stroke participant data can be separated</p> | <p>Non-human</p> <p>Entire cohort under 18 years</p> <p>No diagnosis of stroke</p> <p>Diagnosis of stroke with only cognitive impairment as defined by the International Classification of Functioning, Disability and Health of mental function including cognition, language, visuospatial attention</p> <p>Mixed conditions and adult/child participant groups where adult stroke participant data cannot be separated</p> |

|                                                        |                                                                                                                                                                                                                                                                                                                                                                                                                        |                                                                                                                                                                                                                                                                                                                                                                                                                                 |
|--------------------------------------------------------|------------------------------------------------------------------------------------------------------------------------------------------------------------------------------------------------------------------------------------------------------------------------------------------------------------------------------------------------------------------------------------------------------------------------|---------------------------------------------------------------------------------------------------------------------------------------------------------------------------------------------------------------------------------------------------------------------------------------------------------------------------------------------------------------------------------------------------------------------------------|
| <p><b>5. Interventions DHT</b></p>                     | <p>Specific DHT identified by use of hardware and/or software</p>                                                                                                                                                                                                                                                                                                                                                      | <p>No specific DHT identified</p> <p>Intervention only uses telephone calls or email as a means of communication</p> <p>Use of electrical stimulation alone</p> <p>Use of videos via video player</p>                                                                                                                                                                                                                           |
| <p><b>6. Interventions Physical Rehabilitation</b></p> | <p>Active physical rehabilitation interventions to maintain or reduce disability, optimize function, and facilitate participation in meaningful life tasks (includes risk management and health promotion if physical activity is included)</p>                                                                                                                                                                        | <p>No rehabilitation intervention</p> <p>Intervention for assessment only</p> <p>Interventions which are fully assistive</p> <p>Rehabilitation of mental (cognitive) function</p> <p>Interventions to address medication adherence or diet</p>                                                                                                                                                                                  |
| <p><b>7. Interventions Behaviour Change</b></p>        | <p>An explicit mention of a behaviour change theory, framework, model, or behaviour change technique (BCT) within the DHT intervention description</p> <p>Note- At title and abstract screening stage all articles with a potential for behaviour change will be included for full text screening and at full text screening the behaviour change technique taxonomy v1 (BCTTv1) coding principles will be applied</p> | <p>No explicit behaviour change approach within the DHT intervention</p> <p>An intervention which includes BCTs and uses a DHT, but they are used completely separately</p> <p>A potential BCT such as feedback is explicitly referenced to another theory e.g., motor learning theory without consideration of behaviour change</p> <p>Intervention not described in sufficient detail for BCTs to be identified and coded</p> |
