# Supplementary material for: Behavior Change Approaches in Digital Technology–Based Physical Rehabilitation Interventions Following Stroke: Scoping Review
Source: PubMed Central journal article supplement (PMC11079774; doi:10.2196/48725), 2024-04-24
Supplement: jmir_v26i1e48725_app4.pdf [file jmir_v26i1e48725_app4.pdf]

### Multimedia Appendix 4. Data charting tool

| Data charting                                                                                                                             |                                                           | Notes                                                                       | Pre-set options                                                                                                                                                                                                     |
|-------------------------------------------------------------------------------------------------------------------------------------------|-----------------------------------------------------------|-----------------------------------------------------------------------------|---------------------------------------------------------------------------------------------------------------------------------------------------------------------------------------------------------------------|
| <b>Study Details</b>                                                                                                                      |                                                           |                                                                             |                                                                                                                                                                                                                     |
|                                                                                                                                           | Author(s)                                                 |                                                                             |                                                                                                                                                                                                                     |
|                                                                                                                                           | Title                                                     |                                                                             |                                                                                                                                                                                                                     |
|                                                                                                                                           | Year of publication                                       |                                                                             |                                                                                                                                                                                                                     |
|                                                                                                                                           | Grouped country of origin                                 | Multi-continental – intervention took place across two or more continents   | North America<br>Europe<br>Asia<br>Africa<br>Australasia<br>South America<br>Multi-continental                                                                                                                      |
| <b>Methods</b>                                                                                                                            |                                                           |                                                                             |                                                                                                                                                                                                                     |
| If a study includes a single session followed by a further longer study period, the details from the longer study period will be recorded |                                                           |                                                                             |                                                                                                                                                                                                                     |
|                                                                                                                                           | Study design                                              | Usability study will be included under feasibility/pilot                    | Case study<br>Feasibility/pilot<br>Randomised Controlled Trial<br>Mixed methods<br>Non-randomised /-controlled experimental<br>Non-experimental/observational<br>Single session exploration<br>Qualitative<br>Other |
|                                                                                                                                           | Specify if other                                          |                                                                             |                                                                                                                                                                                                                     |
|                                                                                                                                           | Participant numbers                                       | Use participant numbers for which the participant demographics are reported |                                                                                                                                                                                                                     |
|                                                                                                                                           | Participant characteristics/ age/ range lowest            |                                                                             |                                                                                                                                                                                                                     |
|                                                                                                                                           | Participant characteristics/ age/ range highest           |                                                                             |                                                                                                                                                                                                                     |
|                                                                                                                                           | Participant characteristics/ time since stroke in months* | Conversion to months: years x 12, weeks ÷ 4.3, days x 0.0328767123          |                                                                                                                                                                                                                     |

**Intervention (Based on the TIDieR Checklist)**

All information will relate to the intervention only i.e., not methods of data collection or evaluation and will be charted from the introduction and methods section (not the discussion)

If a DHT is also being used for other functions outside of the defined scope of rehabilitation e.g., BP monitoring, medication adherence then only the rehabilitation aspect will be charted

If a study is described in distinct stages and only some of those stages involve DHT then only this part will be data charted

| TIDieR item |                                                                    |                                                                                                                                                                                                                                                                                    |                                                                                                                                                   |
|-------------|--------------------------------------------------------------------|------------------------------------------------------------------------------------------------------------------------------------------------------------------------------------------------------------------------------------------------------------------------------------|---------------------------------------------------------------------------------------------------------------------------------------------------|
| Why         | Link between intervention and behaviour change approaches          |                                                                                                                                                                                                                                                                                    | Yes<br>No                                                                                                                                         |
|             | Description of link                                                | Summarised by reviewer                                                                                                                                                                                                                                                             |                                                                                                                                                   |
|             | Reference to a specific behaviour change theory framework or model | As defined by the original author                                                                                                                                                                                                                                                  | Yes<br>No                                                                                                                                         |
|             | Specify theory framework or model                                  |                                                                                                                                                                                                                                                                                    |                                                                                                                                                   |
|             | Focus / goal of the intervention                                   |                                                                                                                                                                                                                                                                                    | Upper limb<br>Lower limb<br>Mobility<br>Physical activity<br>Balance<br>Speech and language<br>Multi-focus<br>Activities of daily living<br>Other |
|             | Specify if other                                                   |                                                                                                                                                                                                                                                                                    |                                                                                                                                                   |
| What        | Number of DHT types                                                |                                                                                                                                                                                                                                                                                    | One<br>Two<br>Three                                                                                                                               |
|             | Type(s) of DHT intervention                                        | <b>Virtual Reality (VR)</b> – an artificial environment created in 3D (immersive) or on a visual display (non-immersive) with which the user can interact in real time [38], incorporating any game, activity or exercise<br><b>App</b> – a computer programme used for a specific | VR<br>App<br>Audio-video platform<br>Robotics<br>Messaging platform<br>Activity Monitor                                                           |

|     |                                                    |                                                                                                                                                                                                                                                                                                                                                                                                                                                                                                                                                                                                                                                                                                                                                                                                                                                                                |                                   |
|-----|----------------------------------------------------|--------------------------------------------------------------------------------------------------------------------------------------------------------------------------------------------------------------------------------------------------------------------------------------------------------------------------------------------------------------------------------------------------------------------------------------------------------------------------------------------------------------------------------------------------------------------------------------------------------------------------------------------------------------------------------------------------------------------------------------------------------------------------------------------------------------------------------------------------------------------------------|-----------------------------------|
|     |                                                    | purpose which can downloaded onto a device or accessed via web browser [39] excluding VR<br><b>Audio- video platform</b> - all synchronous, combined audio and visual communication platforms excluding audio telephone calls<br><b>Robotics</b> – a programmed device (end- effector or exoskeletal) which assists the user through a specific motion whilst providing resistance to undesired movements if indicated [40]<br><b>Messaging platform</b> –all asynchronous communication platforms excluding telephone answering machines<br><b>Activity monitor</b> – a wearable electronic device which delivers feedback about physical activity [14]<br><b>Sensor</b> – a movement sensors which is worn or attached to an object to collect information or provide feedback excluding those that provide physical activity feedback and those associated with a VR system | Sensor<br>Other                   |
|     | Specify if other                                   |                                                                                                                                                                                                                                                                                                                                                                                                                                                                                                                                                                                                                                                                                                                                                                                                                                                                                |                                   |
|     | Behaviour change techniques (BCTs) coded to BCTTv1 | See Multimedia Appendix 5 Review-specific behaviour change technique taxonomy coding decisions                                                                                                                                                                                                                                                                                                                                                                                                                                                                                                                                                                                                                                                                                                                                                                                 |                                   |
|     | Number of BCTs coded                               |                                                                                                                                                                                                                                                                                                                                                                                                                                                                                                                                                                                                                                                                                                                                                                                                                                                                                |                                   |
|     | Number of BCT clusters coded                       |                                                                                                                                                                                                                                                                                                                                                                                                                                                                                                                                                                                                                                                                                                                                                                                                                                                                                |                                   |
|     | BCTs coded by authors and documented in the source |                                                                                                                                                                                                                                                                                                                                                                                                                                                                                                                                                                                                                                                                                                                                                                                                                                                                                | Yes<br>No                         |
| How | Supervision                                        | Synchronous contact with the participant either face to face or remotely during the intervention excluding initial session set up<br>Provided through the DHT and /or provided to support the use of the DHT                                                                                                                                                                                                                                                                                                                                                                                                                                                                                                                                                                                                                                                                   | Yes<br>No<br>Both<br>Not reported |
|     | If supervised specify if face to face or remote    |                                                                                                                                                                                                                                                                                                                                                                                                                                                                                                                                                                                                                                                                                                                                                                                                                                                                                | Face to face<br>Remote            |

|                   |                                  |                                                                                                                                                                                               |                                                                                                                                                                                                |
|-------------------|----------------------------------|-----------------------------------------------------------------------------------------------------------------------------------------------------------------------------------------------|------------------------------------------------------------------------------------------------------------------------------------------------------------------------------------------------|
|                   |                                  |                                                                                                                                                                                               | Both<br>Not reported                                                                                                                                                                           |
|                   | Individual or group intervention | Group is 2+ participants with stroke                                                                                                                                                          | Individual<br>Group<br>Both<br>Not reported                                                                                                                                                    |
| Where             | Location of the intervention     | Community includes a gym or community centre<br>Health care setting includes hospitals (in and out-patients) and community clinics<br>Research setting includes laboratories and universities | Home<br>Community<br>Healthcare setting<br>Research setting<br>Home and healthcare<br>Home and research<br>Home and community<br>Home and other (other not specified)<br>Not reported<br>Other |
|                   | Specify if other                 |                                                                                                                                                                                               |                                                                                                                                                                                                |
| When and how much | Duration in weeks                | Length of time (longest duration if a range is given) over which intervention is provided in weeks with single exploratory sessions identified as such.<br>Conversion to months: weeks ÷ 4.3  |                                                                                                                                                                                                |

\*Use mean or median (mean used as preference unless there is evidence that the data is markedly skewed)
