# Supplementary material for: Behavior Change Approaches in Digital Technology–Based Physical Rehabilitation Interventions Following Stroke: Scoping Review
Source: PubMed Central journal article supplement (PMC11079774; doi:10.2196/48725), 2024-04-24
Supplement: jmir_v26i1e48725_app6.pdf [file jmir_v26i1e48725_app6.pdf]

Multimedia Appendix 6. Intervention characteristics (with associated references)

|                                         | <b>Intervention Data</b>         | <b>Studies<br/>(n=103),<br/>n (%)</b> | <b>Citations (as referenced in main manuscript)</b>                                                                                                   |
|-----------------------------------------|----------------------------------|---------------------------------------|-------------------------------------------------------------------------------------------------------------------------------------------------------|
| <b>Intervention Focus</b>               | Upper limb                       | 65 (63%)                              | [46-49,51,54-59,62-65,68,71,72,74,75,77-81,85-88,92,95,96,99,101-103,105-108,110,112,113,116-118,121,123-125,127,128,132,133,135-137,139-142,144-147] |
|                                         | Multi-focus                      | 13 (13%)                              | [50,53,61,66,84,89,104,111,119,120,126,130,143]                                                                                                       |
|                                         | Physical activity                | 10 (10%)                              | [67,76,82,91,94,100,122,129,131,138]                                                                                                                  |
|                                         | Mobility                         | 5 (5%)                                | [60,70,73,109,115]                                                                                                                                    |
|                                         | Activities of daily living       | 4 (4%)                                | [83,90,93,97]                                                                                                                                         |
|                                         | Lower limb                       | 4 (4%)                                | [52,69,134,148]                                                                                                                                       |
|                                         | Balance                          | 1 (%)                                 | [98]                                                                                                                                                  |
|                                         | Speech                           | 1 (%)                                 | [114]                                                                                                                                                 |
| <b>Individual or Group Intervention</b> | Individual                       | 96 (93%)                              | [46-80,84-94,96-117,119-121,124-148]                                                                                                                  |
|                                         | Group                            | 2 (2%)                                | [81,123]                                                                                                                                              |
|                                         | Combination                      | 4 (4%)                                | [82,83,118,122]                                                                                                                                       |
|                                         | Not reported                     | 1 (1%)                                | [95]                                                                                                                                                  |
| <b>Intervention Location</b>            | Home                             | 48 (47%)                              | 47-50,53,55-58,60,61,64-66,69,70,72,75-77,84,85,90,93,94,96,97,99,101,105,111,116,117,119-121,126,129,130,134,136,138,139,141,143-145,147]            |
|                                         | Home and another setting         | 14 (14%)                              | [46,54,67,68,74,79,80,82,83,86,89,112,122,131]                                                                                                        |
|                                         | Healthcare setting               | 19 (18%)                              | [51,62,63,71,73,81,91,95,100,102-104,107,109,124,125,133,135,146]                                                                                     |
|                                         | Research setting                 | 12 (12%)                              | [52,59,87,98,110,115,118,127,128,132,140,142]                                                                                                         |
|                                         | Not reported                     | 10 (10%)                              | [78,88,92,106,108,113,114,123,137,148]                                                                                                                |
| <b>Supervision</b>                      | Supervised                       | 32 (31%)                              | [47,52,57,62,63,70,71,73,78,81,83,87,88,92,98,102,104,108,113,115,118,120,123-125,135,137,140-142,146,148]                                            |
|                                         | Both supervised and unsupervised | 38 (37%)                              | [46,48-50,53,54,60,65-69,72,74,76,77,79,80,82,84,86,89-91,93,100,109,112,114,117,122,129,130,131,136,138,144,145]                                     |
|                                         | Unsupervised                     | 23 (22%)                              | [58,61,64,75,85,94-97,99,101,103,105,111,116,119,121,126,133,134,139,143,147]                                                                         |
|                                         | Not Reported                     | 10 (10%)                              | [51,55,56,59,106,107,110,127,128,132]                                                                                                                 |
| <b>Supervision Contact</b>              | Face-to-face (F2F)               | 48 (47%)                              | [46,47,52,57,60,62,63,67,68,71,73,78,81-84,86-89,91,92,98,100,102,104,108,109,112-115,117,118,120,122-125,135-137,140,142,144-146,148]                |
|                                         | Remote                           | 12 (12%)                              | [48-50,65,66,69,72,74,93,129,138,141]                                                                                                                 |
|                                         | Combination (F2F and remote)     | 10 (10%)                              | [53,54,70,76,77,79,80,90,130,131]                                                                                                                     |
|                                         | Not supervised / unreported      | 33 (32%)                              | [51,55,56,58,59,61,64,75,85,94-97,99,101,103,105-107,110,111,116,119,121,126-128,132-134,139,143,147]                                                 |

|                             |                                                                                                                                   |          |                                                                                                                                                    |
|-----------------------------|-----------------------------------------------------------------------------------------------------------------------------------|----------|----------------------------------------------------------------------------------------------------------------------------------------------------|
| <b>Numbers of DHT Types</b> | One                                                                                                                               | 57 (55%) | [46,47,51-54,57,61,63,67,68,70,71,73,75-78,81,84-86,88-91,93,95,96,98,100,102-104,106,109,112,114,115,123-126,129,130,132,133,135-138,140,143-147] |
|                             | Two                                                                                                                               | 30 (29%) | [48,49,55,56,58-60,62,64,69,83,92,94,97,99,101,105,107,108,110,111,113,116,118,121,122,127,128,139,142]                                            |
|                             | Three                                                                                                                             | 16 (16%) | [50,65,66,72,74,79, 80,82,87,117,119,120,131,134,141,148]                                                                                          |
| <b>DHT Type</b>             | Virtual reality                                                                                                                   | 58 (56%) | [46-49,51-53,57,59,62,63,65,66,69,71,72,74,77,78,80,81,84-89,92,95,96,98,102-104,106, 112,113,115,117-120,123-128,132,135-137,140,142,143,146-148] |
|                             | App                                                                                                                               | 31 (30%) | [50,55,56,58,61,64-66,72,74,75,79,82,83,94,97,99,101,105,108,111,114,116,119-122,131,134,139,141]                                                  |
|                             | Sensor                                                                                                                            | 17 (17%) | [50,55,56,87,94,99,101,105,108,110,111,116,119-121,134,141]                                                                                        |
|                             | Activity monitor                                                                                                                  | 16 (16%) | [67,68,73,76,79,80,82,91,100,109,122,129,138,139,144,145]                                                                                          |
|                             | Audio-video platform                                                                                                              | 15 (15%) | [48-50,54,65,66,69,70,72,74,79,80,93,131,141]                                                                                                      |
|                             | Robotics                                                                                                                          | 13 (13%) | [59,62,87,92,107,110,113,117,118,127,128,142,148]                                                                                                  |
|                             | Messaging platform                                                                                                                | 11 (11%) | [58,60,64,82,83,90,97,117,130,131,134]                                                                                                             |
|                             | Other (Brain computer interface technology, reminders on a wearable device and camcorder recording of sessions for remote review) | 4 (4%)   | [60,107,133,148]                                                                                                                                   |

DHT: Digital health technology
