# Supplementary material for: Behavior Change Approaches in Digital Technology–Based Physical Rehabilitation Interventions Following Stroke: Scoping Review
Source: PubMed Central journal article supplement (PMC11079774; doi:10.2196/48725), 2024-04-24
Supplement: jmir_v26i1e48725_app7.pdf [file jmir_v26i1e48725_app7.pdf]

Multimedia Appendix 7. Behaviour change theories, models and frameworks reported (with associated references)

| <b>Theory, Model or Framework</b>   | <b>Studies (n=18), n(%)</b> | <b>Citations (as referenced in main manuscript)</b> |
|-------------------------------------|-----------------------------|-----------------------------------------------------|
| Social cognitive theory             | 6 (33%)                     | [76,109,111,121,129,130]                            |
| Behaviour change technique taxonomy | 4 (22%)                     | [48,49,122,129]                                     |
| Game design theory                  | 3 (17%)                     | [47,57,125]                                         |
| Operant conditioning                | 3 (17%)                     | [47,98,121]                                         |
| Self-determination theory           | 3 (17%)                     | [48,49,126]                                         |
| Arousal theories                    | 2 (11%)                     | [70,113]                                            |
| Goal setting theory                 | 2 (11%)                     | [109,121]                                           |
| Transtheoretical model              | 1 (6%)                      | [145]                                               |
| Control Theory                      | 1 (6%)                      | [129]                                               |
| Intrinsic motivation theory         | 1 (6%)                      | [113]                                               |
| Health action process approach      | 1 (6%)                      | [109]                                               |
| Flow theory                         | 1 (6%)                      | [102]                                               |
| Persuasive technology               | 1 (6%)                      | [47]                                                |
