# Supplementary material for: Behavior Change Approaches in Digital Technology–Based Physical Rehabilitation Interventions Following Stroke: Scoping Review
Source: PubMed Central journal article supplement (PMC11079774; doi:10.2196/48725), 2024-04-24
Supplement: jmir_v26i1e48725_app8.pdf [file jmir_v26i1e48725_app8.pdf]

### Multimedia Appendix 8. Individual behaviour change techniques coded

| <b>BCT Cluster</b>         | <b>Total BCTs coded in cluster</b> | <b>Individual BCT</b>                                             | <b>Total Individual BCTs coded</b> |
|----------------------------|------------------------------------|-------------------------------------------------------------------|------------------------------------|
| 1. Goals and planning      | 85                                 | 1.1 Goal setting (behaviour)                                      | 14                                 |
|                            |                                    | 1.2 Problem solving                                               | 15                                 |
|                            |                                    | 1.3 Goal setting (outcome)                                        | 20                                 |
|                            |                                    | 1.4 Action planning                                               | 10                                 |
|                            |                                    | 1.5 Review behaviour goal(s)                                      | 7                                  |
|                            |                                    | 1.6 Discrepancy between current behaviour and goal                | 4                                  |
|                            |                                    | 1.7 Review outcome goal(s)                                        | 6                                  |
|                            |                                    | 1.8 Behavioural contract                                          | 7                                  |
|                            |                                    | 1.9 Commitment                                                    | 2                                  |
| 2. Feedback and monitoring | 119                                | 2.1 Monitoring of behaviour by others without feedback            | 17                                 |
|                            |                                    | 2.2 Feedback on behaviour                                         | 83                                 |
|                            |                                    | 2.3 Self-monitoring of behaviour                                  | 12                                 |
|                            |                                    | 2.4 Self-monitoring of outcome(s) of behaviour                    | 1                                  |
|                            |                                    | 2.5 Monitoring outcome(s) of behaviour by others without feedback | 2                                  |
|                            |                                    | 2.6 Biofeedback                                                   | 2                                  |
|                            |                                    | 2.7 Feedback on outcome(s) of behaviour                           | 2                                  |
| 3. Social support          | 26                                 | 3.1 Social support (unspecified)                                  | 23                                 |
|                            |                                    | 3.2 Social support (practical)                                    | 2                                  |
|                            |                                    | 3.3 Social support (emotional)                                    | 1                                  |
| 4. Shaping knowledge       | 37                                 | 4.1 Instruction on how to perform a behaviour                     | 34                                 |
|                            |                                    | 4.2 Information about antecedents                                 | 2                                  |
|                            |                                    | 4.3 Re-attribution                                                | 1                                  |

|                                |    |                                                             |    |
|--------------------------------|----|-------------------------------------------------------------|----|
| 5. Natural consequences        | 3  | 5.1 Information about health consequences                   | 1  |
|                                |    | 5.2 Salience of consequences                                | 1  |
|                                |    | 5.3 Information about social and environmental consequences | 1  |
| 6. Comparison of behaviour     | 23 | 6.1 Demonstration of the behaviour                          | 17 |
|                                |    | 6.2 Social comparison                                       | 6  |
| 7. Associations                | 16 | 7.1 Prompts/cues                                            | 16 |
| 8. Repetition and substitution | 6  | 8.1 Behavioural practice/ rehearsal                         | 1  |
|                                |    | 8.7 Graded tasks                                            | 5  |
| 9. Comparison of outcome       | 2  | 9.1 Credible source                                         | 2  |
| 10. Reward and threat          | 57 | 10.1 Material incentive (behaviour)                         | 1  |
|                                |    | 10.3 Non-specific reward                                    | 55 |
|                                |    | 10.4 Social reward                                          | 1  |
| 12. Antecedents                | 3  | 12.1 Restructuring the physical environment                 | 1  |
|                                |    | 12.5 Adding objects to the environment                      | 1  |
|                                |    | 12.6 Body changes                                           | 1  |
| 14. Scheduled consequences     | 5  | 14.1 Behaviour cost                                         | 1  |
|                                |    | 14.2 Punishment                                             | 2  |
|                                |    | 14.3 Remove reward                                          | 1  |
|                                |    | 14.10 Remove punishment                                     | 1  |
| 15. Self-belief                | 1  | 15.2 Mental rehearsal of successful performance             | 1  |

BCT codes which were not identified during intervention coding in this review have been excluded from the table.
